# Supplementary material
Source: Springer Nature journal article supplement (https://www.springermedizin.de/resource/supplementary/12884_2008_46_MOESM1_ESM.pdf/9459814)
Supplement: MOESM1 [file 9459814]

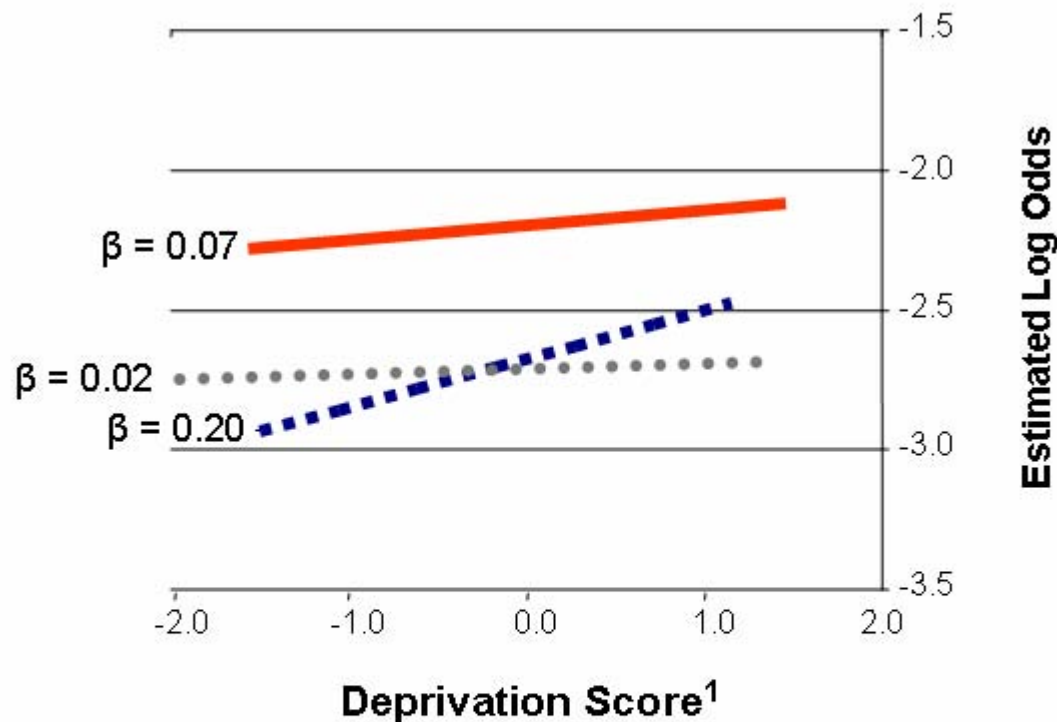

- Non-Hispanic Black women in eight US urban centers, 1998-2001 (n = 102,377)<sup>2</sup>
- - - Non-Hispanic White women in eight US urban centers, 1998-2001 (n = 129,523)<sup>2</sup>
- . . . Women in Santiago, Chile, 2004 (n = 49,771)
